# Supplementary material
Source: MDPI journal article supplement (https://www.mdpi.com/1999-4907/9/5/241)
Supplement: s1 [file s1]

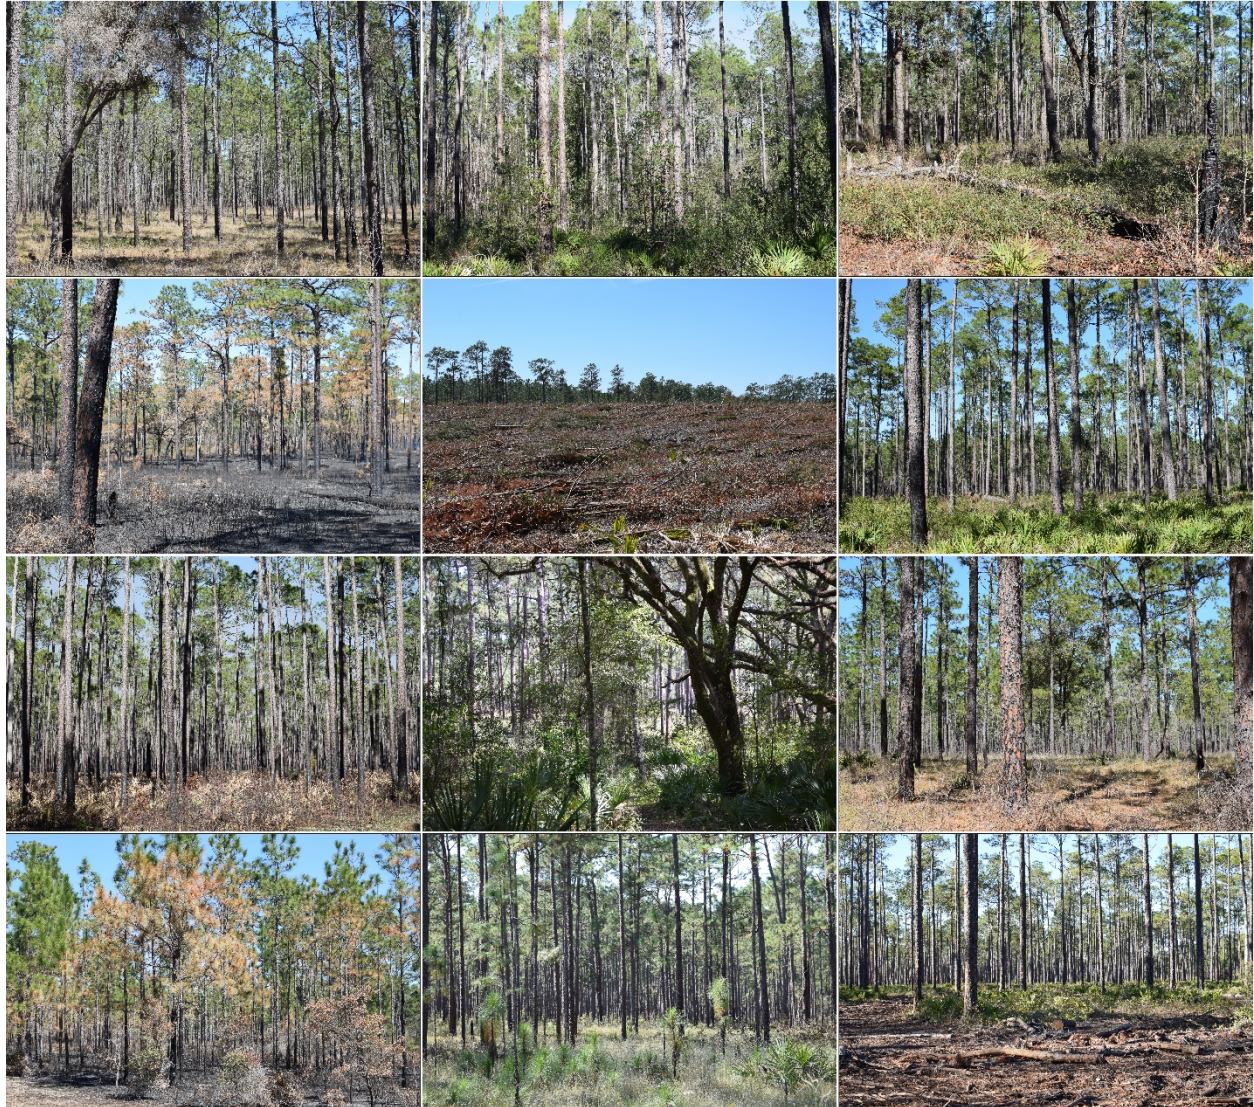

**Figure S1.** Photographic images used for panel selection of good and poor-quality RCW habitat in Ocala National Forest, USA.
